# Supplementary material for: Structural properties of supercooled deep eutectic solvents: choline chloride–thiourea compared to reline
Source: Royal Society of Chemistry journal article supplement (doi:10.1039/d1cp05162h), 2022-01-01
Supplement: d1cp05162h1.pdf [file d1cp05162h1.pdf]

*Supporting Information*

**Structural properties of supercooled deep eutectic solvents: choline chloride–thiourea compared to reline**

Elena A. Golysheva,<sup>1</sup> Natalya A. Maslennikova,<sup>1,2</sup> Denis S. Baranov,<sup>1</sup> Sergei A. Dzuba<sup>1\*</sup>

<sup>1</sup>Voevodsky Institute of Chemical Kinetics and Combustion, Russian Academy of Sciences, Novosibirsk, Russia

<sup>2</sup>Department of Physics, Novosibirsk State University, Russia

\*E-mail: [dzuba@kinetics.nsc.ru](mailto:dzuba@kinetics.nsc.ru)

**Synthesis and purification of choline chloride**

Trimethylamine obtained by treating trimethylamine hydrochloride (13.3 g, 0.14 mole) with 14M solution of sodium hydroxide (150 mL) was distilled into 2-chloroethanol (50 mL) at 60 °C for 5 h. Then acetone (500 mL) was added, the precipitate was filtered, washed with dry acetone (200 mL), and residues solvent were removed under vacuum (4 mm Hg) for 1 h. Yield: 14.1 g (72%).

## Characterization

$^1\text{H}$  NMR spectra were recorded with a Bruker AV-500 spectrometer – see Figure S1.

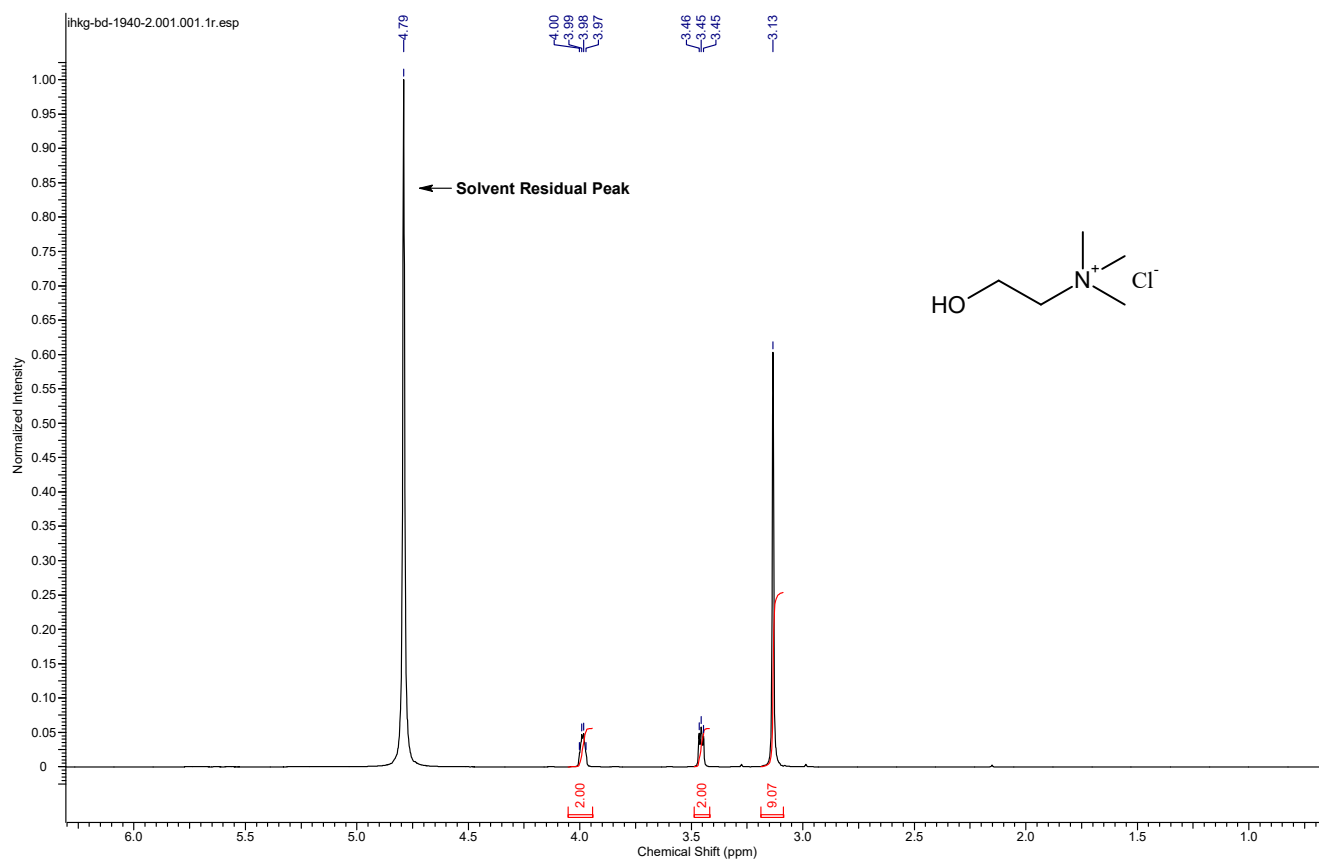

**Figure S1.**  $^1\text{H}$  NMR ( $\text{D}_2\text{O}$ , 500 MHz) spectrum of synthesized choline chloride.

Interpretation:  $\delta$  3.99 (m, 2H), 3.45 (m, 2H), 3.13 (s, 9H) ppm.

The water content determined by Karl Fischer titration with Titrator TitroLine KF (platinum electrode, solvent: methanol) was less than 150 ppm.
